# Supplementary material for: The status of donor cancer tissues affects the fate of patient-derived colorectal cancer xenografts in NOG mice
Source: PubMed Central journal article supplement — Exp Anim. 2015 Jan 26;64(2):181–90. doi: 10.1538/expanim.14-0080 (PMC4427733; doi:10.1538/expanim.14-0080), 2015-01-26
Supplement: expanim-64-181-s001.pdf [file expanim-64-181-s001.pdf]

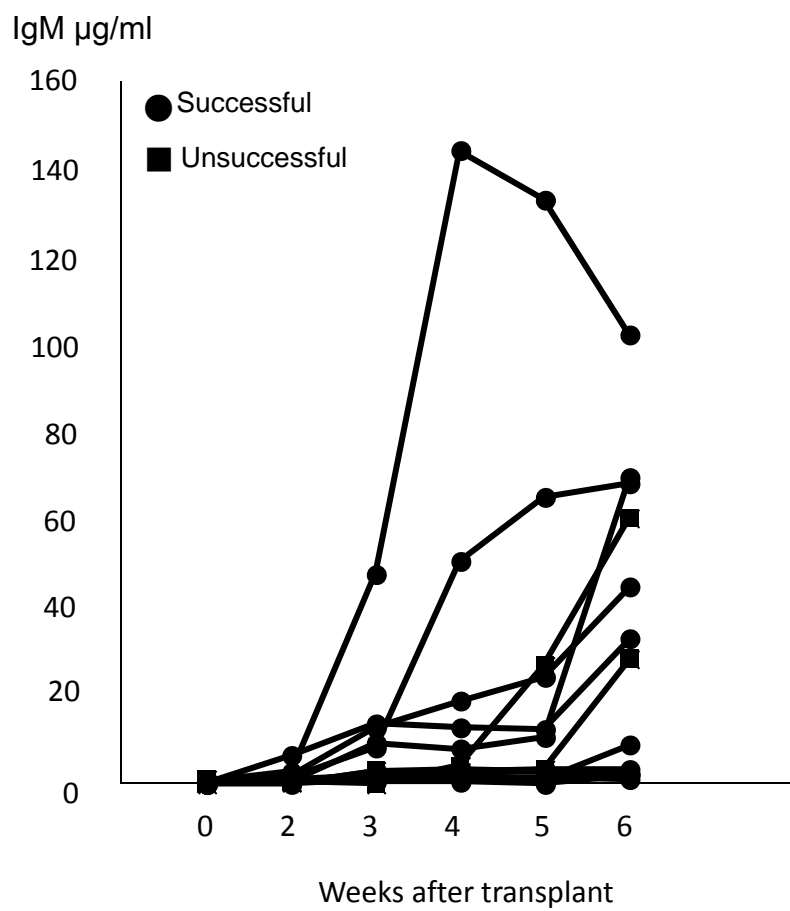

Supplementary Figure 1. Time course observation of IgM concentration in the host serum. Each line represents 1 host.

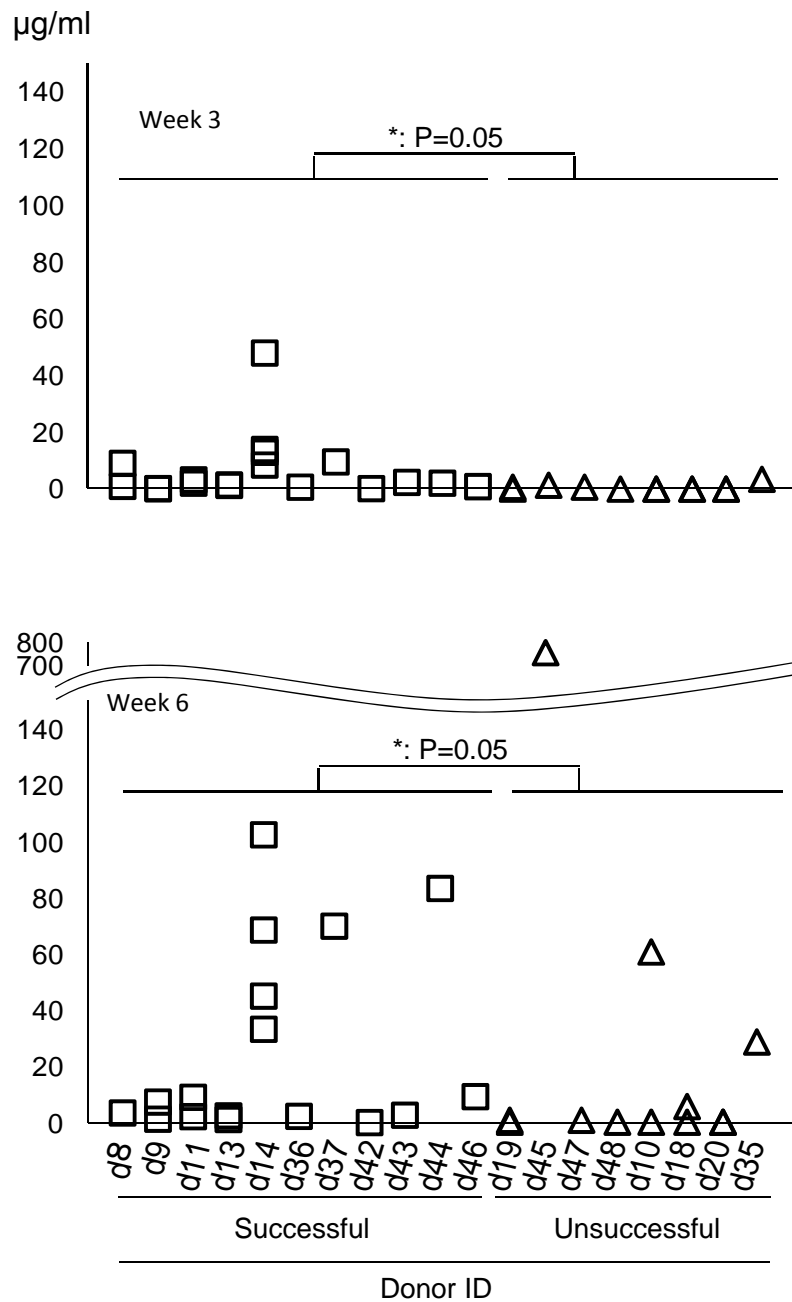

Supplementary Figure 2. IgM concentration in the host serum compared between unsuccessful-engraftment and successful-engraftment cases at Weeks 3 and 6 after transplantation of human tumor tissues. Each column represents one donor, and each symbol one host. There was a statistically significant difference (Wilcoxon signed-rank test) at both time points, with higher levels for successful cases.

Original patient tissue

Transplanted tissue

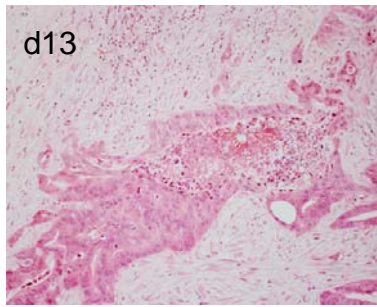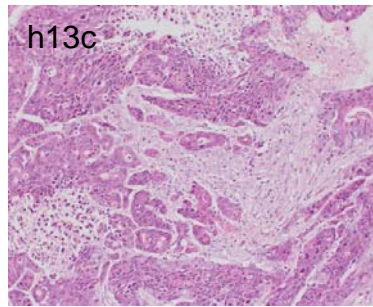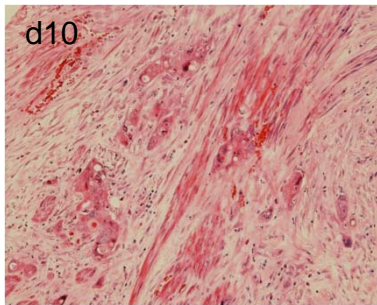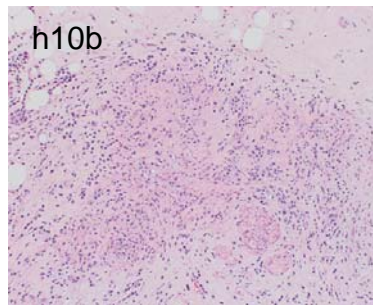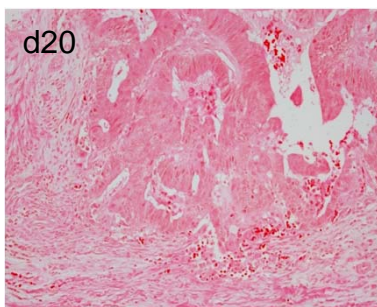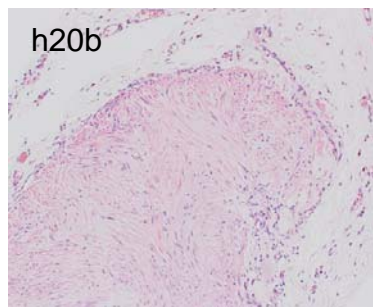

Supplementary Figure 3. Comparison between original patient tissue and transplanted tissue.
