# Supplementary material for: The status of donor cancer tissues affects the fate of patient-derived colorectal cancer xenografts in NOG mice
Source: PubMed Central journal article supplement — Exp Anim. 2015 Jan 26;64(2):181–90. doi: 10.1538/expanim.14-0080 (PMC4427733; doi:10.1538/expanim.14-0080), 2015-01-26
Supplement: expanim-64-181-s002.pdf [file expanim-64-181-s002.pdf]

Supplementary Table 1. Donor and corresponding host ID for each evaluation

| Donor ID | Tumor aggressiveness | Analysis of T cells | Host ID | Engraftability | Donor-matched tissue | Detailed histopathological examination | Serum IgG concentration |                                                |
|----------|----------------------|---------------------|---------|----------------|----------------------|----------------------------------------|-------------------------|------------------------------------------------|
|          |                      |                     |         |                |                      |                                        | Timecourse observation  | Comparison with engraftability (3 and 6 weeks) |
| d1       | √                    |                     | h1a     | √              | √                    | √                                      |                         |                                                |
|          |                      |                     | h1b     | √              | √                    | √                                      |                         |                                                |
|          |                      |                     | h1c     | √              | √                    | √                                      |                         |                                                |
| d2       | √                    |                     | h2a     | √              | √                    | √                                      |                         |                                                |
|          |                      |                     | h2b     | √              | √                    | √                                      |                         |                                                |
| d3       | √                    | √                   | h3a     | √              | √                    | √                                      |                         |                                                |
|          |                      |                     | h3b     | √              | √                    | √                                      |                         |                                                |
| d4       | √                    |                     | h4a     | √              | √                    | √                                      |                         |                                                |
|          |                      |                     | h4b     | √              | √                    | √                                      |                         |                                                |
| d5       | √                    |                     | h5a     | √              | √                    | √                                      |                         |                                                |
|          |                      |                     | h5b     | √              | √                    | √                                      |                         |                                                |
| d6       | √                    | √                   | h6a     | √              | √                    | √                                      |                         |                                                |
|          |                      |                     | h6b     | √              | √                    | √                                      |                         |                                                |
| d7       | √                    | √                   | h7a     | √              | √                    | √                                      |                         |                                                |
|          |                      |                     | h7b     | √              | √                    | √                                      |                         |                                                |
| d8       | √                    | √                   | h8a     | √              | √                    | √                                      | √                       | √                                              |
|          |                      |                     | h8b     | √              | √                    | √                                      |                         | √                                              |
| d9       | √                    |                     | h9a     | √              | √                    | √                                      |                         | √                                              |
|          |                      |                     | h9b     | √              | √                    | √                                      |                         | √                                              |
| d10      | √                    |                     | h10a    | √              | √                    | √                                      |                         | √                                              |
|          |                      |                     | h10b    | √              | √                    | √                                      | √                       | √                                              |
| d11      | √                    | √                   | h11a    | √              | √                    | √                                      | √                       | √                                              |
|          |                      |                     | h11b    | √              | √                    | √                                      | √                       | √                                              |
| d12      | √                    | √                   | h12a    | √              | √                    | √                                      |                         |                                                |
|          |                      |                     | h12b    | √              | √                    | √                                      |                         |                                                |
| d13      | √                    | √                   | h13a    | √              | √                    | √                                      | √                       | √                                              |
|          |                      |                     | h13b    | √              | √                    | √                                      |                         |                                                |
|          |                      |                     | h13c    | √              | √                    | √                                      |                         |                                                |
|          |                      |                     | h13d    | √              | √                    | √                                      | √                       | √                                              |
| d14      | √                    | √                   | h14a    | √              | √                    | √                                      | √                       | √                                              |
|          |                      |                     | h14b    | √              | √                    | √                                      | √                       | √                                              |
|          |                      |                     | h14c    | √              | √                    | √                                      | √                       | √                                              |
|          |                      |                     | h14d    | √              | √                    | √                                      | √                       | √                                              |
| d15      | √                    |                     | h15a    | √              | √                    | √                                      |                         |                                                |
|          |                      |                     | h15b    | √              | √                    | √                                      |                         |                                                |
| d16      | √                    |                     | h16a    | √              | √                    | √                                      |                         |                                                |
|          |                      |                     | h16b    | √              | √                    | √                                      |                         |                                                |
| d17      | √                    |                     | h17a    | √              | √                    | √                                      |                         |                                                |
|          |                      |                     | h17b    | √              | √                    | √                                      |                         |                                                |
|          |                      |                     | h17c    | √              | √                    | √                                      |                         |                                                |
| d18      | √                    | √                   | h18a    | √              | √                    | √                                      |                         | √                                              |
|          |                      |                     | h18b    | √              | √                    | √                                      |                         | √                                              |
| d19      | √                    |                     | h19a    | √              | √                    | √                                      |                         | √                                              |
|          |                      |                     | h19b    | √              | √                    | √                                      |                         | √                                              |
| d20      | √                    |                     | h20a    | √              | √                    | √                                      |                         | √                                              |
|          |                      |                     | h20b    | √              | √                    | √                                      |                         | √                                              |
| d21      | √                    |                     | h21     | √              |                      | √                                      |                         |                                                |
| d22      | √                    |                     | h22     | √              |                      | √                                      |                         |                                                |
| d23      | √                    |                     | h23     | √              |                      | √                                      |                         |                                                |
| d24      | √                    | √                   | h24     | √              |                      | √                                      |                         |                                                |
| d25      | √                    | √                   | h25     | √              |                      | √                                      |                         |                                                |
| d26      | √                    |                     | h26     | √              |                      | √                                      |                         |                                                |
| d27      | √                    |                     | h27     | √              |                      | √                                      |                         |                                                |
| d28      | √                    |                     | h28     | √              |                      | √                                      |                         |                                                |
| d29      | √                    | √                   | h29     | √              |                      | √                                      |                         |                                                |
| d30      | √                    | √                   | h30     | √              |                      | √                                      |                         |                                                |
| d31      | √                    |                     | h31     | √              |                      | √                                      |                         |                                                |
| d32      | √                    |                     | h32     | √              |                      | √                                      |                         |                                                |
| d33      | √                    |                     | h33     | √              |                      | √                                      |                         |                                                |
| d34      | √                    | √                   | h34     | √              |                      | √                                      |                         |                                                |
| d35      | √                    | √                   | h35     | √              |                      | √                                      | √                       | √                                              |
| d36      | √                    |                     | h36     | √              |                      | √                                      | √                       | √                                              |
| d37      | √                    |                     | h37     | √              |                      | √                                      | √                       | √                                              |
| d38      | √                    |                     | h38     | √              |                      | √                                      |                         |                                                |
| d39      | √                    |                     | h39     | √              |                      | √                                      |                         |                                                |
| d40      | √                    |                     | h40     | √              |                      | √                                      |                         |                                                |
| d41      | √                    |                     | h41     | √              |                      | √                                      |                         |                                                |
| d42      | √                    |                     | h42     | √              |                      | √                                      |                         | √                                              |
| d43      | √                    |                     | h43     | √              |                      | √                                      |                         | √                                              |
| d44      | √                    |                     | h44     | √              |                      | √                                      |                         | √                                              |
| d45      | √                    |                     | h45     | √              |                      | √                                      |                         | √                                              |
| d46      | √                    |                     | h46     | √              |                      | √                                      |                         | √                                              |
| d47      | √                    | √                   | h47     | √              |                      | √                                      |                         | √                                              |
| d48      | √                    |                     | h48     | √              |                      | √                                      |                         | √                                              |

√, evaluation carried out.
